# Supplementary material for: Joint association of Body Roundness Index and Atherogenic Index of Plasma with new-onset stroke in middle-aged and older adults: first evidence from the China Health and Retirement Longitudinal Study
Source: Research Square preprint supplement (doi:10.21203/rs.3.rs-7488889/v1), 2025-10-22
Supplement: Supplementary file 1 [file 280f2e23dee54ca7b41ec971.docx]

**Joint association of Body Roundness Index and Atherogenic Index of Plasma with new-onset stroke in middle-aged and older adults: first evidence from the China Health and Retirement Longitudinal Study**

**Supplementary Materials**

**
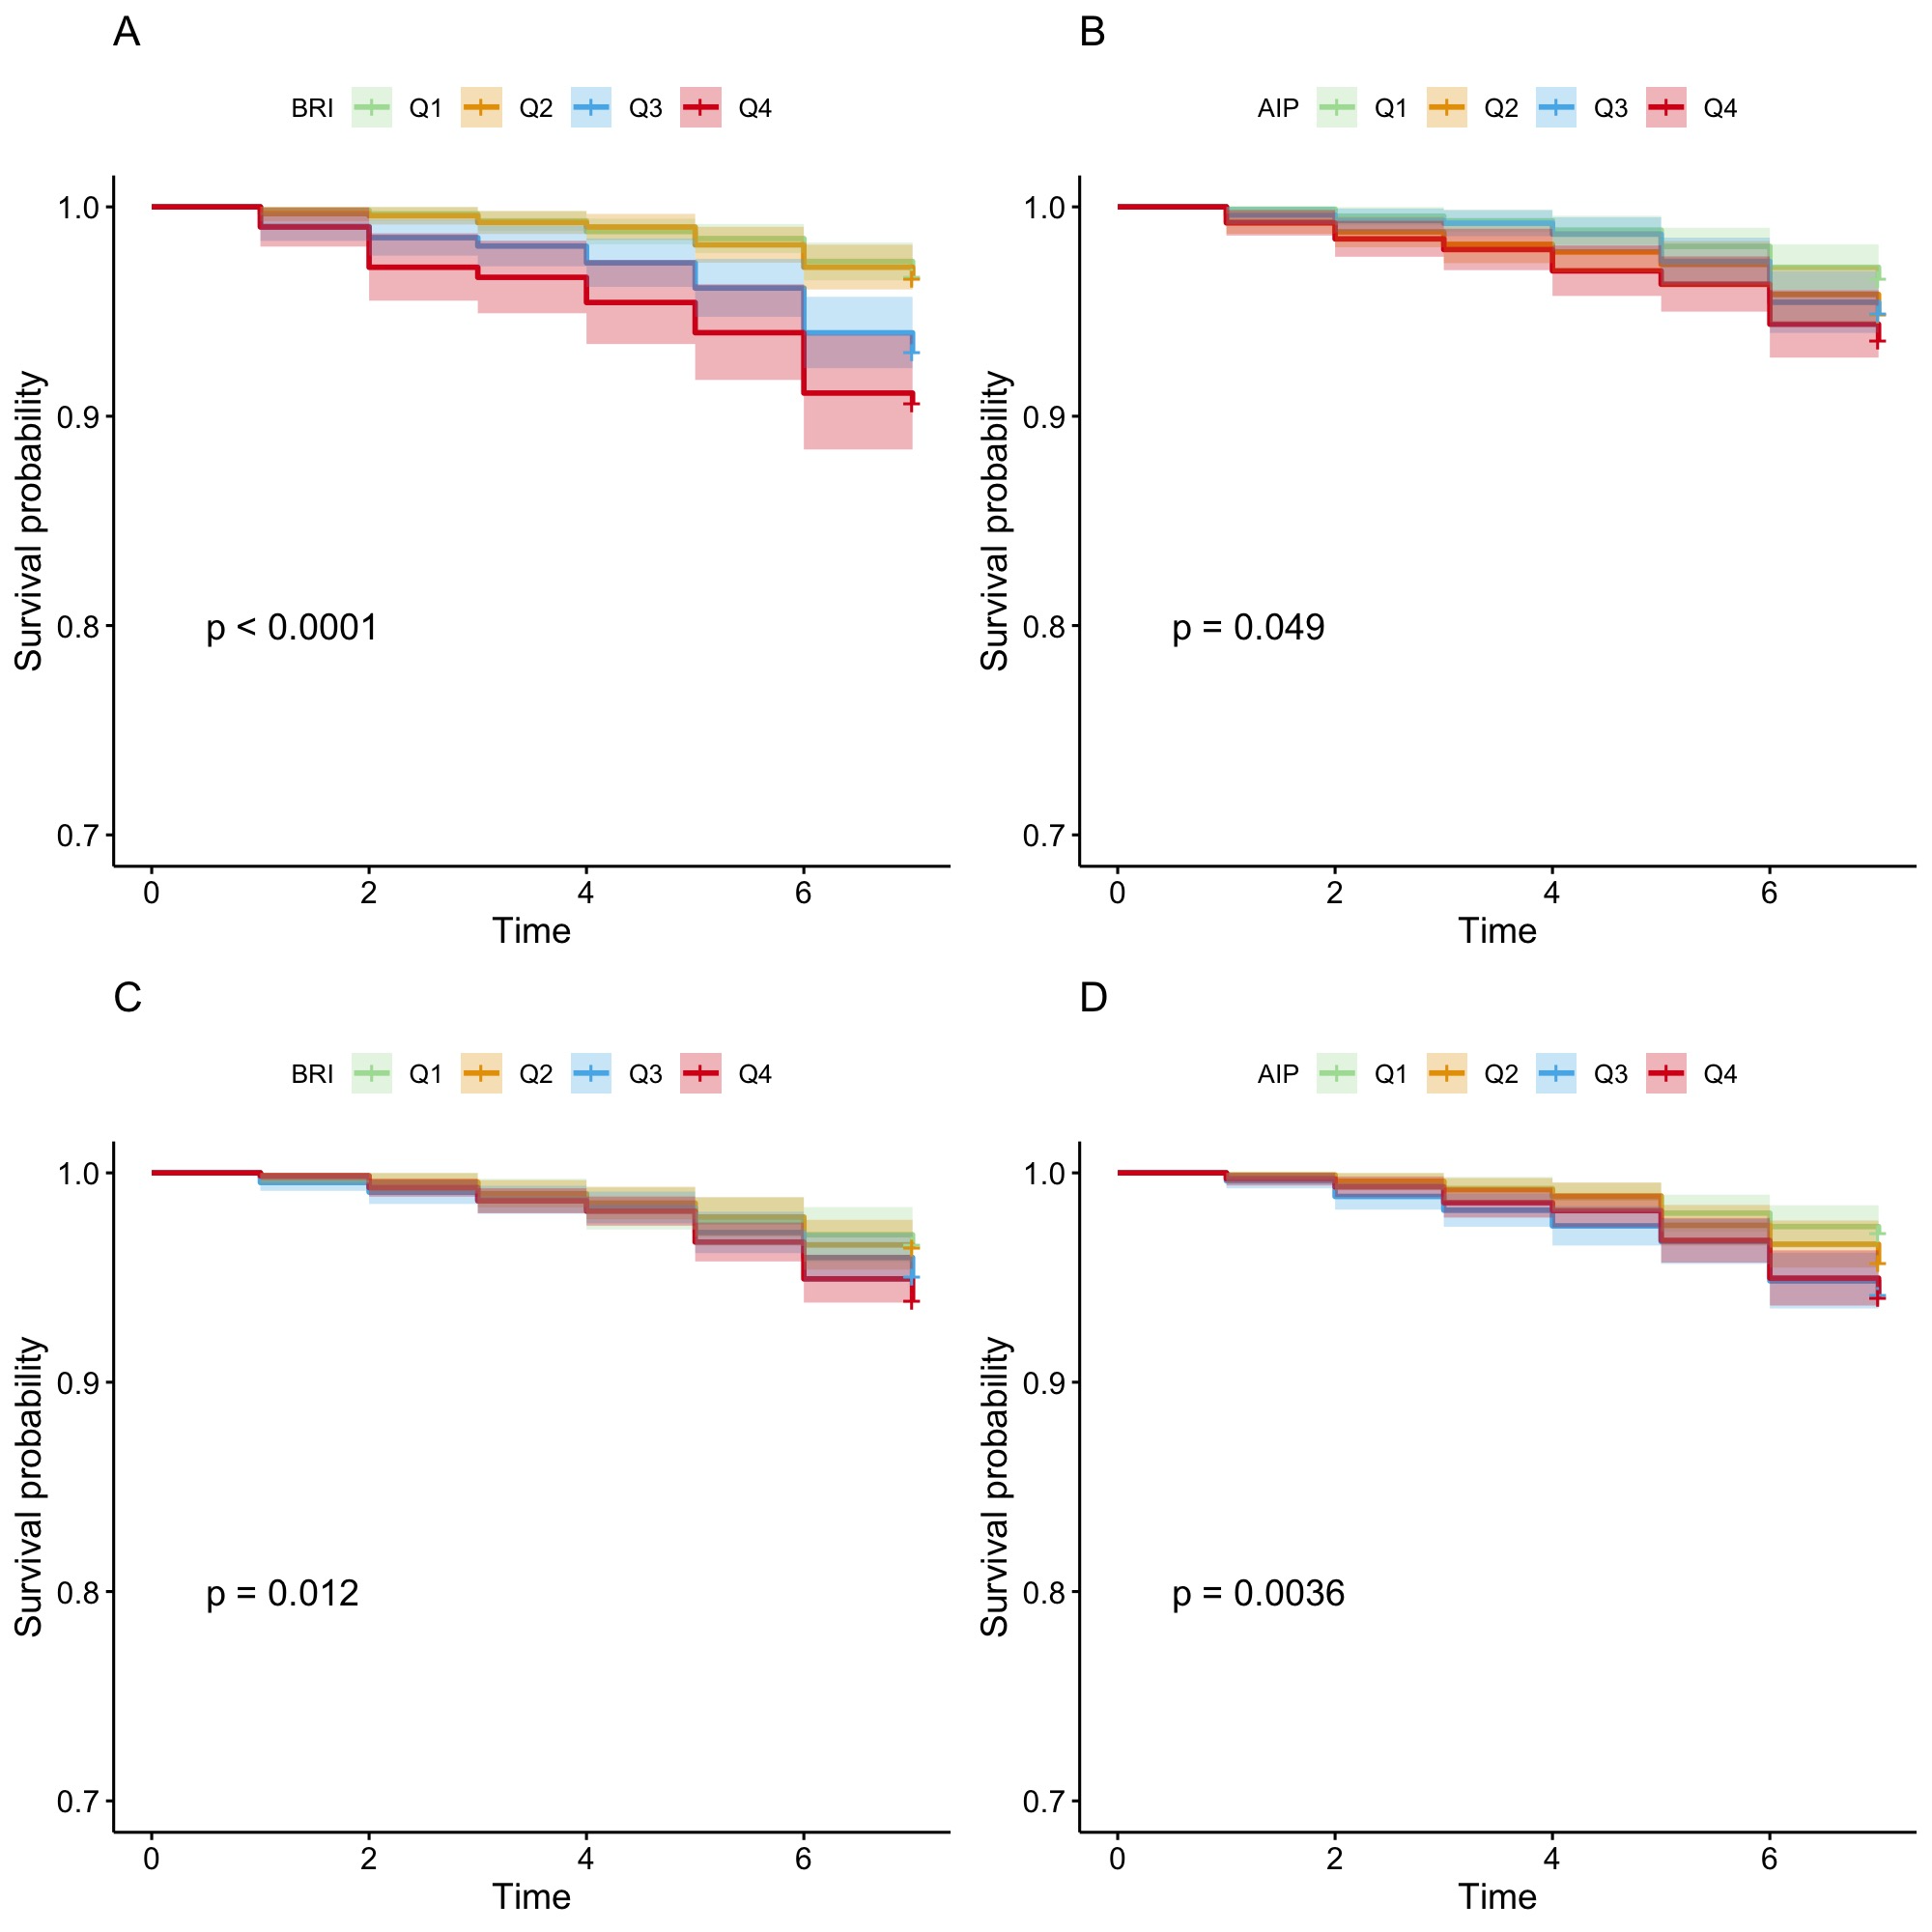
**

**Supplementary Figure 1. Kaplan–Meier Curves for Stroke Incidence by BRI and AIP Stratification in Men and Women Aged ≥45 Years**

Kaplan–Meier survival curves depicting stroke-free probability among individuals aged 45 years and older, stratified by Body Roundness Index (BRI) and Atherogenic Index of Plasma (AIP) quartiles, and separated by sex.

(A) BRI quartiles in men.

(B) AIP quartiles in men.

(C) BRI quartiles in women.

(D) AIP quartiles in women.

Participants were divided into quartiles (Q1–Q4) based on BRI or AIP levels. Shaded areas represent 95% confidence intervals. Log-rank test *P* values are shown in each panel.

**
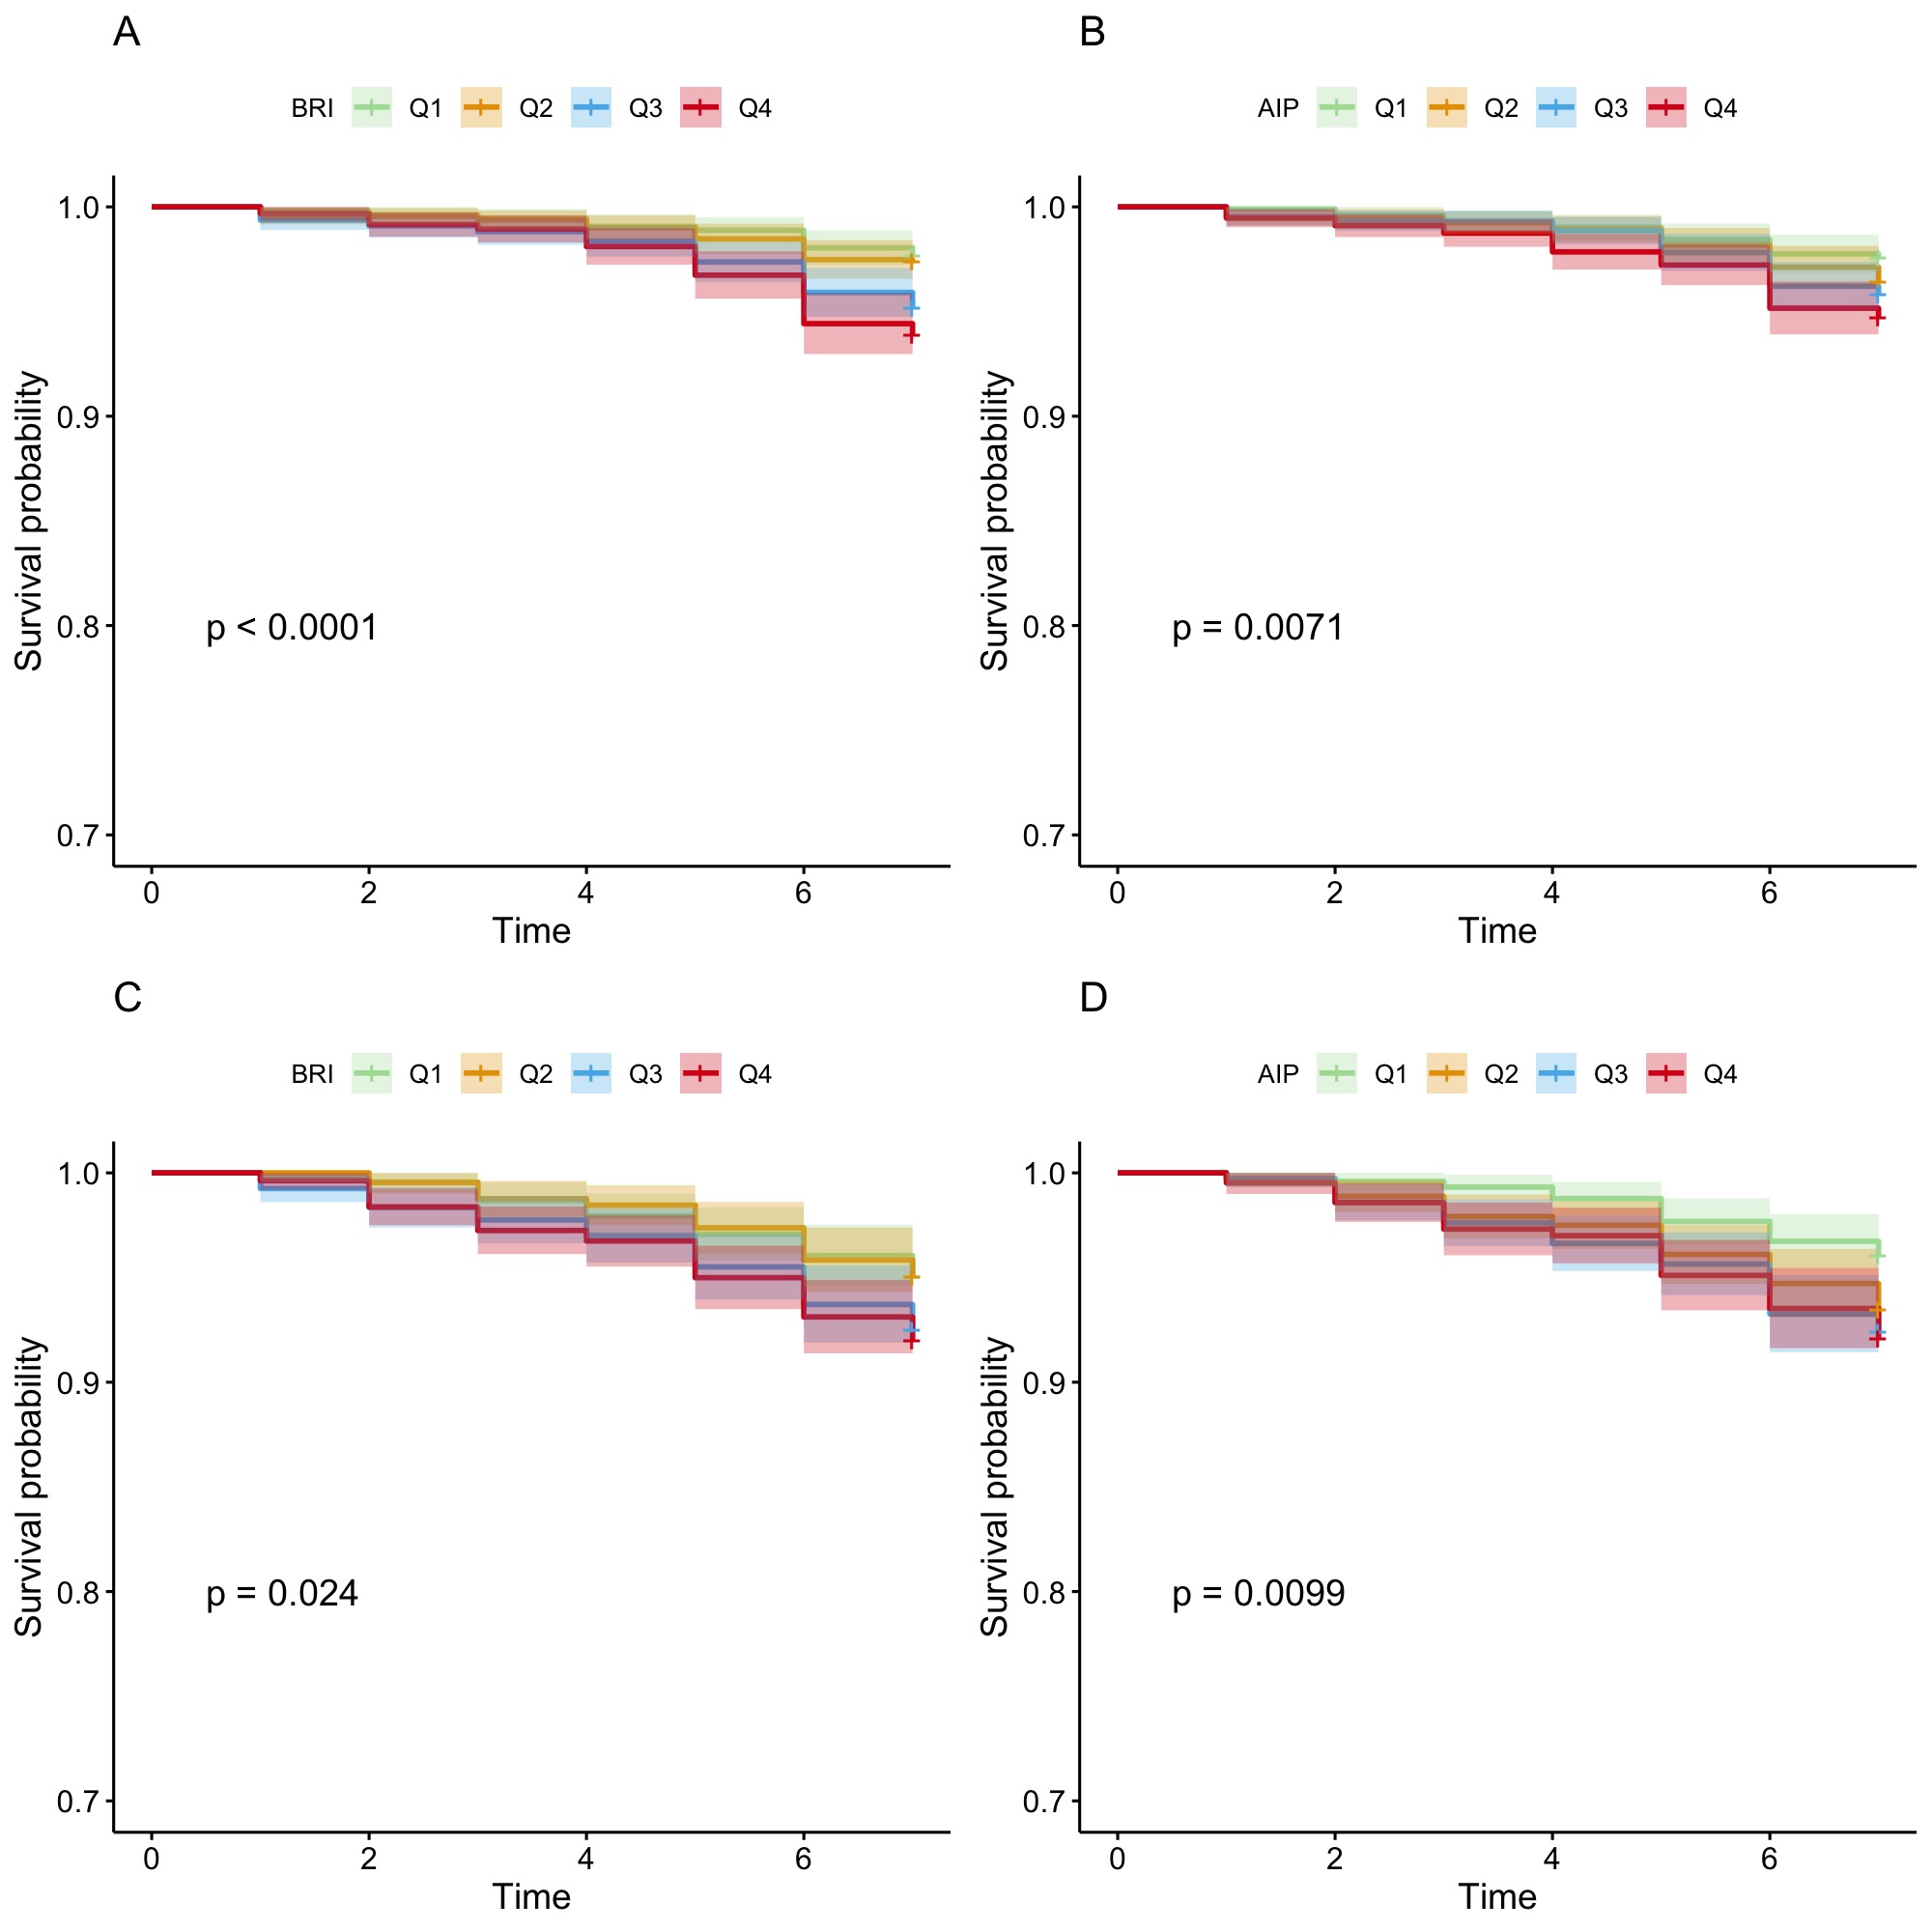
Supplementary Figure 2. Kaplan–Meier Curves for Stroke Incidence Stratified by BRI and AIP in Middle-Aged and Older Adults.**

Kaplan–Meier survival curves showing stroke-free probability among participants aged ≥45 years, stratified by quartiles of Body Roundness Index (BRI) and Atherogenic Index of Plasma (AIP), and grouped by age.

(A) BRI quartiles in middle-aged adults (45–59 years).

(B) AIP quartiles in middle-aged adults (45–59 years).

(C) BRI quartiles in older adults (≥60 years).

(D) AIP quartiles in older adults (≥60 years).

Participants were classified into quartiles (Q1–Q4) based on BRI or AIP values.

| **Supplementary Table 1. Independent associations of BRI and AIP with the risks of stroke among male adults a.** | | | | | | | | | |
| --- | --- | --- | --- | --- | --- | --- | --- | --- | --- |
|  |  | Model A |  |  | Model B |  |  | Model C |  |
|  | HR | 95% CI | *P* value | HR | 95% CI | *P* value | HR | 95% CI | *P* value |
| **BRI** |  |  |  |  |  |  |  |  |  |
| Continuous | 1.39 | 1.24-1.56 | <0.001 | 1.40 | 1.25-1.57 | <0.001 | 1.27 | 1.12-1.45 | <0.001 |
| Q1 | Reference |  |  | Reference |  |  | Reference |  |  |
| Q2 | 1.02 | 0.64-1.62 | 0.945 | 1.01 | 0.63-1.61 | 0.968 | 0.95 | 0.59-1.53 | 0.845 |
| Q3 | 2.11 | 1.40-3.19 | <0.001 | 2.10 | 1.39 -3.17 | <0.001 | 1.76 | 1.14-2.72 | 0.011 |
| Q4 | 2.90 | 1.87- 4.51 | <0.001 | 2.92 | 1.88-4.53 | <0.001 | 2.18 | 1.34 -3.54 | 0.002 |
| *P* trend |  |  | <0.001 |  |  | <0.001 |  |  | <0.001 |
| **AIP** |  |  |  |  |  |  |  |  |  |
| Continuous | 1.85 | 1.25-2.75 | 0.002 | 2.17 | 1.44-3.25 | <0.001 | 1.66 | 1.07- 2.56 | 0.023 |
| Q1 | Reference |  |  | Reference |  |  | Reference |  |  |
| Q2 | 1.51 | 1.40-3.12 | 0.082 | 1.56 | 0.98- 2.47 | 0.061 | 1.41 | 0.88-2.27 | 0.156 |
| Q3 | 1.49 | 1.56-3.31 | 0.100 | 1.58 | 0.99-2.54 | 0.058 | 1.51 | 0.93-2.45 | 0.093 |
| Q4 | 1.88 | 1.20-2.95 | 0.0056 | 2.12 | 1.35-3.34 | 0.001 | 1.68 | 1.04-2.71 | 0.033 |
| *P* trend |  |  | 0.009 |  |  | 0.002 |  |  | 0.036 |
| Abbreviations: CI, confidence interval; HR, hazard ratio. The associations are presented as HRs (95% CI). Model A did not adjust for any covariates. Model B adjusted for age. Model C further adjusted for educational level, residence, marital status, smoking history, drinking history, hypertension, diabetes, heart disease, dyslipidemia, kidney disease, glycated hemoglobin level and CRP level based on Model B. | | | | | | | | | |
|  |
|  |

| **Supplementary Table 2. Independent associations of BRI and AIP with the risks of stroke among female adults a**. | | | | | | | | | |
| --- | --- | --- | --- | --- | --- | --- | --- | --- | --- |
|  |  | Model A |  |  | Model B |  |  | Model C |  |
|  | HR | 95% CI | *P* value | HR | 95% CI | *P* value | HR | 95% CI | *P* value |
| **BRI** |  |  |  |  |  |  |  |  |  |
| Continuous | 1.19 | 1.10-1.29 | <0.001 | 1.16 | 1.07-1.26 | <0.001 | 1.06 | 0.97-1.17 | 0.845 |
| Q1 | Reference |  |  | Reference |  |  | Reference |  |  |
| Q2 | 1.04 | 0.60-1.79 | 0.893 | 1.04 | 0.60-1.79 | 0.882 | 0.94 | 0.54-1.62 | 0.810 |
| Q3 | 1.46 | 0.89-2.40 | 0.135 | 1.46 | 0.89 -2.40 | 0.134 | 1.22 | 0.74-2.03 | 0.434 |
| Q4 | 1.81 | 1.13- 2.88 | 0.013 | 1.65 | 1.03-2.65 | 0.036 | 1.17 | 0.72 -1.90 | 0.537 |
| *P* trend |  |  | 0.001 |  |  | 0.007 |  |  | 0.334 |
| **AIP** |  |  |  |  |  |  |  |  |  |
| Continuous | 1.91 | 1.29-2.83 | 0.001 | 1.86 | 1.25-2.76 | 0.002 | 1.47 | 0.97- 2.25 | 0.071 |
| Q1 | Reference |  |  | Reference |  |  | Reference |  |  |
| Q2 | 1.50 | 0.93-2.43 | 0.099 | 1.48 | 0.92- 2.40 | 0.110 | 1.38 | 0.84-2.24 | 0.200 |
| Q3 | 2.05 | 1.30-3.22 | 0.002 | 2.03 | 1.29-3.18 | 0.002 | 1.73 | 1.09-2.75 | 0.021 |
| Q4 | 2.10 | 1.34-3.30 | 0.001 | 2.06 | 1.31-3.23 | 0.002 | 1.67 | 1.04-2.65 | 0.031 |
| *P* trend |  |  | <0.001 |  |  | <0.001 |  |  | 0.024 |
| Abbreviations: CI, confidence interval; HR, hazard ratio. The associations are presented as HRs (95% CI). Model A did not adjust for any covariates. Model B adjusted for age. Model C further adjusted for educational level, residence, marital status, smoking history, drinking history, hypertension, diabetes, heart disease, dyslipidemia, kidney disease, glycated hemoglobin level and CRP level based on Model B. | | | | | | | | | |
|  |
|  |

| **Supplementary Table 3. Independent associations of BRI and AIP with the risks of stroke among middle-aged adults a.** | | | | | | | | | |
| --- | --- | --- | --- | --- | --- | --- | --- | --- | --- |
|  |  | Model A |  |  | Model B |  |  | Model C |  |
|  | HR | 95% CI | *P* value | HR | 95% CI | *P* value | HR | 95% CI | *P* value |
| **BRI** |  |  |  |  |  |  |  |  |  |
| Continuous | 1.29 | 1.17-1.43 | <0.001 | 1.34 | 1.21-1.48 | <0.001 | 1.17 | 1.04-1.32 | 0.011 |
| Q1 | Reference |  |  | Reference |  |  | Reference |  |  |
| Q2 | 1.12 | 0.66-1.91 | 0.669 | 1.19 | 0.69-2.03 | 0.530 | 1.06 | 0.61-1.84 | 0.842 |
| Q3 | 2.10 | 1.30-3.37 | 0.002 | 2.30 | 1.42 -3.72 | <0.001 | 1.84 | 1.11-3.05 | 0.019 |
| Q4 | 2.67 | 1.67- 4.27 | <0.001 | 3.11 | 1.91-5.05 | <0.001 | 2.01 | 1.18 -3.42 | 0.011 |
| *P* trend |  |  | <0.001 |  |  | <0.001 |  |  | 0.001 |
| **AIP** |  |  |  |  |  |  |  |  |  |
| Continuous | 2.25 | 1.53-3.33 | <0.001 | 2.24 | 1.52-3.31 | <0.001 | 1.53 | 1.00- 2.35 | 0.049 |
| Q1 | Reference |  |  | Reference |  |  | Reference |  |  |
| Q2 | 1.46 | 0.88-2.42 | 0.144 | 1.46 | 0.88-2.43 | 0.141 | 1.42 | 0.84-2.40 | 0.185 |
| Q3 | 1.72 | 1.05-2.81 | 0.030 | 1.73 | 1.06-2.83 | 0.029 | 1.44 | 0.86-2.41 | 0.165 |
| Q4 | 2.20 | 1.38-3.51 | <0.001 | 2.20 | 1.38-3.51 | <0.001 | 1.64 | 1.00-2.69 | 0.052 |
| *P* trend |  |  | <0.001 |  |  | <0.001 |  |  | 0.055 |
| Abbreviations: CI, confidence interval; HR, hazard ratio. The associations are presented as HRs (95% CI). Model A did not adjust for any covariates. Model B adjusted for age. Model C further adjusted for educational level, residence, marital status, smoking history, drinking history, hypertension, diabetes, heart disease, dyslipidemia, kidney disease, glycated hemoglobin level and CRP level based on Model B. | | | | | | | | | |
|  |
|  |

| **Supplementary Table 4. Independent associations of BRI and AIP with the risks of stroke among older adults a.** | | | | | | | | | |
| --- | --- | --- | --- | --- | --- | --- | --- | --- | --- |
|  |  | Model A |  |  | Model B |  |  | Model C |  |
|  | HR | 95% CI | *P* value | HR | 95% CI | *P* value | HR | 95% CI | *P* value |
| **BRI** |  |  |  |  |  |  |  |  |  |
| Continuous | 1.17 | 1.08-1.26 | <0.001 | 1.19 | 1.09-1.29 | <0.001 | 1.13 | 1.03-1.24 | 0.009 |
| Q1 | Reference |  |  | Reference |  |  | Reference |  |  |
| Q2 | 0.99 | 0.61-1.61 | 0.970 | 1.01 | 0.62-1.64 | 0.975 | 0.94 | 0.58-1.53 | 0.801 |
| Q3 | 1.53 | 0.99-2.36 | 0.057 | 1.58 | 1.02 -2.46 | 0.043 | 1.38 | 0.88-2.17 | 0.164 |
| Q4 | 1.64 | 1.08- 2.49 | 0.020 | 1.76 | 1.13-2.74 | 0.013 | 1.39 | 0.88-2.21 | 0.166 |
| *P* trend |  |  | 0.004 |  |  | 0.005 |  |  | 0.076 |
| **AIP** |  |  |  |  |  |  |  |  |  |
| Continuous | 1.74 | 1.14-2.64 | 0.010 | 1.74 | 1.14-2.66 | 0.010 | 1.55 | 1.00- 2.41 | 0.053 |
| Q1 | Reference |  |  | Reference |  |  | Reference |  |  |
| Q2 | 1.68 | 1.06-2.67 | 0.028 | 1.68 | 1.06-2.68 | 0.027 | 1.50 | 0.93-2.40 | 0.093 |
| Q3 | 1.96 | 1.25-3.08 | 0.003 | 1.97 | 1.25-3.09 | 0.003 | 1.89 | 1.20-2.99 | 0.006 |
| Q4 | 2.05 | 1.29-3.23 | 0.002 | 2.05 | 1.30-3.25 | 0.002 | 1.80 | 1.12-2.88 | 0.015 |
| *P* trend |  |  | 0.002 |  |  | 0.002 |  |  | 0.009 |
| Abbreviations: CI, confidence interval; HR, hazard ratio. The associations are presented as HRs (95% CI). Model A did not adjust for any covariates. Model B adjusted for age. Model C further adjusted for educational level, residence, marital status, smoking history, drinking history, hypertension, diabetes, heart disease, dyslipidemia, kidney disease, glycated hemoglobin level and CRP level based on Model B. | | | | | | | | | |
|  |
|  |
